# Supplementary material
Source: publisher site journal article supplement (https://www.dovepress.com/article/398897)
Supplement: Supplementary file 1 [file get_supplementary_file.php]

Table S1. SPIRIT 2013 Checklist: Recommended items to address in a clinical trial protocol and related documents*

| Section/item | Item | Description | Page |
| --- | --- | --- | --- |
| **Administrative information** | | |  |
| Title | 1 | Descriptive title identifying the study design, population, interventions, and, if applicable, trial acronym | 1 |
| Trial registration | 2a | Trial identifier and registry name. If not yet registered, name of intended registry | 2,5 |
| 2b | All items from the World Health Organization Trial Registration Data Set | 2-16 |
| Protocol version | 3 | Date and version identifier | 4 |
| Funding | 4 | Sources and types of financial, material, and other support | 17 |
| Roles and responsibilities | 5a | Names, affiliations, and roles of protocol contributors | 17 |
| 5b | Name and contact information for the trial sponsor | 17 |
|  | 5c | Role of study sponsor and funders, if any, in study design; collection, management, analysis, and interpretation of data; writing of the report; and the decision to submit the report for publication, including whether they will have ultimate authority over any of these activities | 17 |
|  | 5d | Composition, roles, and responsibilities of the coordinating centre, steering committee, endpoint adjudication committee, data management team, and other individuals or groups overseeing the trial, if applicable (see Item 21a for data monitoring committee) | 5,11 |
| Introduction |  |  |  |
| Background and rationale | 6a | Description of research question and justification for undertaking the trial, including summary of relevant studies (published and unpublished) examining benefits and harms for each intervention | 3.4 |
|  | 6b | Explanation for choice of comparators | 3 |
| Objectives | 7 | Specific objectives or hypotheses | 4 |
| Trial design | 8 | Description of trial design including type of trial (eg, parallel group, crossover, factorial, single group), allocation ratio, and framework (eg, superiority, equivalence, noninferiority, exploratory) | 4 |
| Methods: Participants, interventions, and outcomes | | |  |
| Study setting | 9 | Description of study settings (eg, community clinic, academic hospital) and list of countries where data will be collected. Reference to where list of study sites can be obtained | 5 |
| Eligibility criteria | 10 | Inclusion and exclusion criteria for participants. If applicable, eligibility criteria for study centres and individuals who will perform the interventions (eg, surgeons, psychotherapists) | 5 |
| Interventions | 11a | Interventions for each group with sufficient detail to allow replication, including how and when they will be administered | 6-8 |
| 11b | Criteria for discontinuing or modifying allocated interventions for a given trial participant (eg, drug dose change in response to harms, participant request, or improving/worsening disease) | 6-8 |
| 11c | Strategies to improve adherence to intervention protocols, and any procedures for monitoring adherence (eg, drug tablet return, laboratory tests) | 6-8 |
| 11d | Relevant concomitant care and interventions that are permitted or prohibited during the trial | 8 |
| Outcomes | 12 | Primary, secondary, and other outcomes, including the specific measurement variable (eg, systolic blood pressure), analysis metric (eg, change from baseline, final value, time to event), method of aggregation (eg, median, proportion), and time point for each outcome. Explanation of the clinical relevance of chosen efficacy and harm outcomes is strongly recommended | 9,10 |
| Participant timeline | 13 | Time schedule of enrolment, interventions (including any run-ins and washouts), assessments, and visits for participants. A schematic diagram is highly recommended (see Figure) | Fig.2 |
| Sample size | 14 | Estimated number of participants needed to achieve study objectives and how it was determined, including clinical and statistical assumptions supporting any sample size calculations | 11,12 |
| Recruitment | 15 | Strategies for achieving adequate participant enrolment to reach target sample size | 10 |
| **Methods: Assignment of interventions (for controlled trials)** | | |  |
| Allocation: |  |  |  |
| Sequence generation | 16a | Method of generating the allocation sequence (eg, computer-generated random numbers), and list of any factors for stratification. To reduce predictability of a random sequence, details of any planned restriction (eg, blocking) should be provided in a separate document that is unavailable to those who enrol participants or assign interventions | 5 |
| Allocation concealment mechanism | 16b | Mechanism of implementing the allocation sequence (eg, central telephone; sequentially numbered, opaque, sealed envelopes), describing any steps to conceal the sequence until interventions are assigned | 5 |
| Implementation | 16c | Who will generate the allocation sequence, who will enrol participants, and who will assign participants to interventions | 5 |
| Blinding (masking) | 17a | Who will be blinded after assignment to interventions (eg, trial participants, care providers, outcome assessors, data analysts), and how | 5 |
|  | 17b | If blinded, circumstances under which unblinding is permissible, and procedure for revealing a participant’s allocated intervention during the trial | 5 |
| **Methods: Data collection, management, and analysis** | | |  |
| Data collection methods | 18a | Plans for assessment and collection of outcome, baseline, and other trial data, including any related processes to promote data quality (eg, duplicate measurements, training of assessors) and a description of study instruments (eg, questionnaires, laboratory tests) along with their reliability and validity, if known. Reference to where data collection forms can be found, if not in the protocol | 10,11 |
|  | 18b | Plans to promote participant retention and complete follow-up, including list of any outcome data to be collected for participants who discontinue or deviate from intervention protocols | 10,11 |
| Data management | 19 | Plans for data entry, coding, security, and storage, including any related processes to promote data quality (eg, double data entry; range checks for data values). Reference to where details of data management procedures can be found, if not in the protocol | 10,11 |
| Statistical methods | 20a | Statistical methods for analysing primary and secondary outcomes. Reference to where other details of the statistical analysis plan can be found, if not in the protocol | 11,12 |
|  | 20b | Methods for any additional analyses (eg, subgroup and adjusted analyses) | 11,12 |
|  | 20c | Definition of analysis population relating to protocol non-adherence (eg, as randomised analysis), and any statistical methods to handle missing data (eg, multiple imputation) | 11,12 |
| **Methods: Monitoring** | | |  |
| Data monitoring | 21a | Composition of data monitoring committee (DMC); summary of its role and reporting structure; statement of whether it is independent from the sponsor and competing interests; and reference to where further details about its charter can be found, if not in the protocol. Alternatively, an explanation of why a DMC is not needed | 10,11 |
|  | 21b | Description of any interim analyses and stopping guidelines, including who will have access to these interim results and make the final decision to terminate the trial | na |
| Harms | 22 | Plans for collecting, assessing, reporting, and managing solicited and spontaneously reported adverse events and other unintended effects of trial interventions or trial conduct | 9 |
| Auditing | 23 | Frequency and procedures for auditing trial conduct, if any, and whether the process will be independent from investigators and the sponsor | 10,11 |
| Ethics and dissemination | | |  |
| Research ethics approval | 24 | Plans for seeking research ethics committee/institutional review board (REC/IRB) approval | 5 |
| Protocol amendments | 25 | Plans for communicating important protocol modifications (eg, changes to eligibility criteria, outcomes, analyses) to relevant parties (eg, investigators, REC/IRBs, trial participants, trial registries, journals, regulators) | 5 |
| Consent or assent | 26a | Who will obtain informed consent or assent from potential trial participants or authorised surrogates, and how (see Item 32) | 5,17 |
|  | 26b | Additional consent provisions for collection and use of participant data and biological specimens in ancillary studies, if applicable | na |
| Confidentiality | 27 | How personal information about potential and enrolled participants will be collected, shared, and maintained in order to protect confidentiality before, during, and after the trial | 17 |
| Declaration of interests | 28 | Financial and other competing interests for principal investigators for the overall trial and each study site | 17 |
| Access to data | 29 | Statement of who will have access to the final trial dataset, and disclosure of contractual agreements that limit such access for investigators | 17 |
| Ancillary and post-trial care | 30 | Provisions, if any, for ancillary and post-trial care, and for compensation to those who suffer harm from trial participation | na |
| Dissemination policy | 31a | Plans for investigators and sponsor to communicate trial results to participants, healthcare professionals, the public, and other relevant groups (eg, via publication, reporting in results databases, or other data sharing arrangements), including any publication restrictions | 17 |
|  | 31b | Authorship eligibility guidelines and any intended use of professional writers | na |
|  | 31c | Plans, if any, for granting public access to the full protocol, participant-level dataset, and statistical code | na |
| Appendices |  |  |  |
| Informed consent materials | 32 | Model consent form and other related documentation given to participants and authorised surrogates | na |
| Biological specimens | 33 | Plans for collection, laboratory evaluation, and storage of biological specimens for genetic or molecular analysis in the current trial and for future use in ancillary studies, if applicable | na |

Note: na, not applicable.

*It is strongly recommended that this checklist be read in conjunction with the SPIRIT 2013 Explanation & Elaboration for important clarification on the items. Amendments to the protocol should be tracked and dated. The SPIRIT checklist is copyrighted by the SPIRIT Group under the Creative Commons “[Attribution-NonCommercial-NoDerivs 3.0 Unported](http://www.creativecommons.org/licenses/by-nc-nd/3.0/)” license.

Table S2. Checklist of items for reporting pragmatic trials

| Section | Item | Standard CONSORT description | Extension for pragmatic trials | Page |
| --- | --- | --- | --- | --- |
| Title and abstract | 1 | How participants were allocated to interventions (eg, “random allocation,” “randomised,” or “randomly assigned”) |  | 1 |
| **Introduction** |  |  |  |  |
| Background | 2 | Scientific background and explanation of rationale | Describe the health or health service problem that the intervention is intended to address and other interventions that may commonly be aimed at this problem | 3,4 |
| **Methods** |  |  |  |  |
| Participants | 3 | Eligibility criteria for participants; settings and locations where the data were collected | Eligibility criteria should be explicitly framed to show the degree to which they include typical participants and/or, where applicable, typical providers (eg, nurses), institutions (eg, hospitals), communities (or localities eg, towns) and settings of care (eg, different healthcare financing systems) | 5,6 |
| Interventions | 4 | Precise details of the interventions intended for each group and how and when they were actually administered | Describe extra resources added to (or resources removed from) usual settings in order to implement intervention. Indicate if efforts were made to standardise the intervention or if the intervention and its delivery were allowed to vary between participants, practitioners, or study sites | 6-8 |
| Describe the comparator in similar detail to the intervention |  |
| Objectives | 5 | Specific objectives and hypotheses |  | 3,4 |
| Outcomes | 6 | Clearly defined primary and secondary outcome measures and, when applicable, any methods used to enhance the quality of measurements (eg, multiple observations, training of assessors) | Explain why the chosen outcomes and, when relevant, the length of follow-up are considered important to those who will use the results of the trial | 9,10 |
| Sample size | 7 | How sample size was determined; explanation of any interim analyses and stopping rules when applicable | If calculated using the smallest difference considered important by the target decision maker audience (the minimally important difference) then report where this difference was obtained | 11,12 |
| Randomisation—sequence generation | 8 | Method used to generate the random allocation sequence, including details of any restriction (eg, blocking, stratification) |  | 5 |
| Randomisation—allocation concealment | 9 | Method used to implement the random allocation sequence (eg, numbered containers or central telephone), clarifying whether the sequence was concealed until interventions were assigned |  | 5 |
| Randomisation—implementation | 10 | Who generated the allocation sequence, who enrolled participants, and who assigned participants to their groups |  | 5 |
| Blinding (masking) | 11 | Whether participants, those administering the interventions, and those assessing the outcomes were blinded to group assignment | If blinding was not done, or was not possible, explain why | 5 |
| Statistical methods | 12 | Statistical methods used to compare groups for primary outcomes; methods for additional analyses, such as subgroup analyses and adjusted analyses |  | 11,12 |
| **Results** |  |  |  |  |
| Participant flow | 13 | Flow of participants through each stage (a diagram is strongly recommended)—specifically, for each group, report the numbers of participants randomly assigned, receiving intended treatment, completing the study protocol, and analysed for the primary outcome; describe deviations from planned study protocol, together with reasons | The number of participants or units approached to take part in the trial, the number which were eligible, and reasons for non-participation should be reported | Fig.1 |
| Recruitment | 14 | Dates defining the periods of recruitment and follow-up |  | na |
| Baseline data | 15 | Baseline demographic and clinical characteristics of each group |  | na |
| Numbers analysed | 16 | Number of participants (denominator) in each group included in each analysis and whether analysis was by “intention-to-treat”; state the results in absolute numbers when feasible (eg, 10/20, not 50%) |  | na |
| Outcomes and estimation | 17 | For each primary and secondary outcome, a summary of results for each group and the estimated effect size and its precision (eg, 95% CI) |  | na |
| Ancillary analyses | 18 | Address multiplicity by reporting any other analyses performed, including subgroup analyses and adjusted analyses, indicating which are prespecified and which are exploratory |  | na |
| Adverse events | 19 | All important adverse events or side effects in each intervention group |  | na |
| **Discussion** |  |  |  |  |
| Interpretation | 20 | Interpretation of the results, taking into account study hypotheses, sources of potential bias or imprecision, and the dangers associated with multiplicity of analyses and outcomes |  | na |
| Generalisability | 21 | Generalisability (external validity) of the trial findings | Describe key aspects of the setting which determined the trial results. Discuss possible differences in other settings where clinical traditions, health service organisation, staffing, or resources may vary from those of the trial | na |
| Overall evidence | 22 | General interpretation of the results in the context of current evidence |  | na |

Note: na, not applicable.

***Cite as:*** *Zwarenstein M, Treweek S, Gagnier JJ, Altman DG, Tunis S, Haynes B, Oxman AD, Moher D for the CONSORT and Pragmatic Trials in Healthcare (Practihc) group. Improving the reporting of pragmatic trials: an extension of the CONSORT statement. BMJ 2008; 337;a2390.*

Table S3. Acupoints and their location used in acupotomy, Bloodletting and Tuina

| **Acupoints (code number)** | **Location** | **Process** |
| --- | --- | --- |
| Zusanli (SP35) | On the lateral region of leg,3 cun directly below Dubi (ST35), one finger-breadth lateral to the anterior border of the tibia. | Tuina |
| Yaoshu (GV2) | In the lumbar region, on the posterior midline, directly opposite the sacral fissure. | Acu./ Bloodletting |
| Shiqizhui （EX-B8） | In the lumbar region, on the posterior midline, in the depression below the spinous process of the 5th lumbar vertrbra. | Acu./ Bloodletting |
| Yaoyangguan (GV3) | In the lumbar region, on the posterior midline, in the depression below the spinous process of the 4th lumbar vertrbra. | Acu./ Bloodletting |
| Mingmen (GV4) | In the lumbar region, on the posterior midline, in the depression below the spinous process of the 2rd lumbar vertrbra. | Acu./ Bloodletting |
| Xuanshu（GV5） | In the lumbar region, on the posterior midline, in the depression below the spinous process of the 1st lumbar vertrbra. | Acu./ Bloodletting |
| Sanjiaoshu (BL22) | In the lumbar region,1.5 cun lateral to the depression below the spinous process of the 1st lumbar vertrbra. | Acu./Tuina/ Bloodletting |
| Shenshu (BL23) | In the lumbar region,1.5 cun lateral to the depression below the spinous process of the 2rd lumbar vertrbra. | Acu./Tuina/ Bloodletting |
| Qihaishu (BL24) | In the lumbar region,1.5 cun lateral to the depression below the spinous process of the 3rd lumbar vertrbra. | Acu./Tuina/ Bloodletting |
| Dachangshu (BL25) | In the lumbar region,1.5 cun lateral to the depression below the spinous process of the 4th lumbar vertrbra. | Acu./Tuina/ Bloodletting |
| Guanyuanshu (BL26) | In the lumbar region,1.5 cun lateral to the depression below the spinous process of the 5th lumbar vertrbra. | Acu./Tuina/ Bloodletting |
| Yaoyan (EX-B7) | In the lumbar region, 3.5 cun lateral to the depression below the spinous peocess of the 4th lumbar vertrbra. | Acu./Tuina/ Bloodletting |
| Huantiao (GB30) | On the gluteal region, at the junction of the middle 2/3 and lateral 1/3 of the line joining the prominence of the great trochanter and the sacral hiatus. | Tuina/ Bloodletting |

Note: Acu. means acupotomy.

Table S4. Name and function of Chinese herbal medicine in the process of external therapies, i.e. bloodletting with herbal medicine, and Tuina with ointment

| Latin names  (Chinese Pingyin and characters) | Function (Chinese characters) |
| --- | --- |
| Ephedra sinica Stapf (Mahuang, 麻黄) | Promote urination and relieve swelling (利水消肿) |
| Cinnamomum cassia Presl (Guizhi, 桂枝) | Induce sweating and release muscles；warm and unblock channels (发汗解肌，温通经脉) |
| Stephania tetrandra S.Moore (Fangji, 防己) | Dispel wind and relieve pain; promote urination and relieve edema (祛风除湿，利水消肿，止痛) |
| Cinnamomum cassia Presl (Rougui, 肉桂) | Supplement fire and assiat yang, return fire to its source, dissipate cold and relieve pain, warm and unblock the channels(散寒止痛，温通经脉) |
| Aconitum kusnezoffii Reichb. (Caowu, 草乌) | Dispel wind and relieve pain; promote urination and relieve edema, warm the kidney and dissipate cold (祛风除湿，温经止痛) |
| Artemisia anomala S.Moore Artemisia actiflora Wall.ex DC. (Liujinu, 刘寄奴) | Dissipate blood stasis and alleviate pain (散瘀止痛，疗伤止血) |
| Caesalpinia sappan L. (Sumu苏木) | Invigorate blood and dissipate blood stasis, relieve swelling and alleviate pain (活血化瘀，消肿止痛) |
| Carthamus tinctorius L. (Honghua, 红花) | Invigorate blood and promote menstruation; dissipate blood stasis and alleviate pain (活血通经，散瘀止痛) |
| Liquidambar formosana Hance (Lulutong, 路路通) | Dispel wind and unblock the channels, promote urination and relieve swelling (祛风活络，利水消肿) |
| Piper kadsura（Choisy）Ohwi (Haifengteng, 海风藤) | Dispel wind-damp, unblock the channels and alleviate pain (祛风湿，通经络，止痛) |
| Trachelospermum jasminoides（Lindl.）Lem. (Luoshiteng, 络石藤) | Dispel wind and unblock the channels, cool the blood and relieve swelling祛风通络，凉血消肿 |
| Spatholobus suberectus Dunn (鸡血藤) | Supplement the blood, invigorate the blood; regulate menstruation and relieve pain (活血补血，舒筋活络) |
| Curculigo orchioides Gaertn. (Xianmao, 仙茅) | Supplement kidney yang; strengthen the sinews and bones; dispel cold-damp (补肾阳，强筋骨，祛寒湿) |
| Epimedium brevicornu Maxim. Epimedium sagittatum（Sieb.et Zucc.）Maxim. Epimedium Pubescens Maxim. Epimedium koreanum Maxim. (Yinyanghuo, 淫羊藿) | Supplement kidney yang; strengthen the sinews and bones; dispel wind-damp (补肾壮阳，强筋健骨，祛风湿) |
| Dipsacus asper Wall.ex Henry (Xuduan, 续断) | Strengthen the sinews and bones, invigorate blood and dissipate blood stasis, heal bone fracture and trauma (强筋健骨，活血祛瘀，续筋疗伤) |
| Cibotium barometz（L.）J.Sm. (Gouji, 狗脊) | Dispel wind and relieve pain; promote urination and relieve edema; strengthen the sinews and bones (祛风除湿，强筋健骨) |
| Astragalus membranaceus（Fisch.）Bge.var.mongholicus（Bge.）Hsiao Astragalus membranaceus（Fisch.）Bge. (Huangqi, 黄芪) | Supplement qi and raise yang; promote urination and relieve swelling (补气升阳，利水消肿) |

Table S5. The component of an organized home exercise regimen

| Exercise programme | Practice contents | Purposes |
| --- | --- | --- |
| Stretching exercises |  | The goal of prescribed stretching and strengthening exercises is to decrease the extension forces on the lumbar spine attributable to agonist muscle tightness, antagonist weakness or both, which results in a decreased lumbar lordosis. Conditioning exercises may include walking, riding, and pool exercises, with the goal of increasing general fitness. Education in proper posture and body mechanics for daily functional activities is essential to maintain the gains made through the therapeutic exercise program.  Patients should be advised to perform their therapeutic exercise program at home on a daily basis initially, and at least every other day thereafter. Precautions are given to discontinue any prescribed exercise or activity that leads to recurrent symptoms. |
| Hip flexor stretching | Hip flexors can be stretched with the patient supine in the Thomas test position, progressing to side-lying, half-kneeling. The stretch should be held for 15 to 30 seconds, as tolerated, and repeated three to five times. |
| Hamstring stretching | The hamstrings are best stretched with the patient supine, with a pelvic tilt performed before beginning the stretch. One leg is grasped at the posterior thigh with both hands, the hip is flexed to 90 degrees, and the knee is extended until a stretch is felt in the hamstring region. A duration of 30 seconds has been shown to be the most effective time for stretching of hamstrings.3 This stretch should be repeated three to five times. |
| Lumbar paraspinal stretching | When the patient is supine, the posterior thighs are grasped after being brought up to the chest one at a time, while the patient exhales and performs a posterior pelvic tilt. The patient also can be instructed to raise his or her head at the same time to effect a greater stretch. This stretch is held for 10 seconds. When the patient is sitting, with his or her feet flat on the floor, the patient gently flexes his or her trunk forward. To achieve a greater stretch of the unilateral paraspinals, the ipsilateral shoulder is approximated to the contralateral knee. This stretch is held for 10 seconds, after which the abdominals are contracted to maintain a posterior pelvic tilt while the patient returns to the starting position. These |
| Strengthening exercises |  |
| Abdominal strengthening | Stretching exercises are followed by strengthening exercises, which primarily target the abdominal and gluteal muscles. The abdominal muscles are strengthened by posterior tilts, which can be performed with the patient supine, with the patient on his or her hands and knees, or with the patient standing against a wall. Pelvic tilts are held for 6 seconds and repeated 10 times. Trunk raising then is performed forward and diagonally to each side, targeting the rectus abdominus and oblique abdominal muscles, respectively. These are begun with the patient supine, with his or her knees bent to prevent anterior pull on the pelvis from tight hip flexors. The patients’ arms are extended forward as the head and shoulders are raised. Instructions should be given to raise and lower the trunk slowly. Ten repetitions should be performed while the patient avoids holding his or her breath. |
| Gluteal strengthening | Bridging exercises strengthen the gluteal muscles and are begun with the patient supine with his or her knees bent. A posterior pelvic tilt is performed to reduce the lumbar lordosis as the patient lifts the pelvis by extending the hips. This position is held for 6 seconds and repeated 10 times |
| Conditioning exercises |  |
| Riding bicycle | exercise on a bicycle is well tolerated as patients lean  forward to increase lumbar flexion and obtain  symptomatic relief. |
| Activity exercises | Walking (Walking on an inclined treadmill encourages lumbar flexion and is better tolerated than walking on level surfaces); Swimming (the side stroke may be well tolerated; however, the breast stroke and crawl are best avoided). |
| Education |  |
| Proper posture and body mechanics | Instruction in proper posture and body mechanics for activities of daily living and leisure activities completes the program. Patients should be advised to maintain a posterior pelvic tilt routinely during activities involving reaching, lifting, or carrying. Rigid braces and corsets may be used on a temporary basis to help maintain a reduced lumbar lordosis, especially before abdominal strength is sufficient to accomplish this naturally. The use of a stepping stool and the placing of frequently used household items on countertops or below shoulder level may eliminate or limit the amount of overhead reaching required during the course of a day. Proper lifting techniques should be used at all times, and lifting of heavy objects should be avoided. |

(cited from: M P Bodack 1, M Monteiro. Therapeutic exercise in the treatment of patients with lumbar spinal stenosis. Clin Orthop Relat Res. 2001 Mar;(384):144-52. doi: 10.1097/00003086-200103000-00017.)

**S6. Introduction of process of bloodletting with herbal medicine**

1. Treatment room

1) Ventilation: each operating room should have a ventilation programme. The windows should be open for half an hour before and after treatment, and the ultraviolet light should be disinfected for one hour. 2) Light: One external window should be opened for light for every 15 square metres of operating room, with a light opening of not less than 3 square metres. 3) Temperature: The indoor temperature should be maintained at around 26 degrees. 4) Safety: The indoor hanging equipment should be secure, the bed and chair equipment should be stable, and sharp edges should be prohibited on easily accessible tables and chairs. 5) Quiet: Loud noises are strictly prohibited in the treatment room.

2. Disinfection: The therapist washes hands with a six-part wash in running water before operation, wears disposable sterile gloves and all instruments used are disposable sterile items. Disinfection of the application site includes the skin of the acupotomy and the bamboo cupping 3 times with iodophor. At the end of the treatment, the practitioner is required to separate the waste and clean the hands again.

3. Operating procedures：

3.1 Preparation phase: 1) The practitioner helps the patients to lay sterile disposable treatment towels, assists them to sit, prepares the skin and prepares the treatment. 2) The patients are seated to expose the skin of the lower back. If the associated lower limb symptoms are more severe, the patient may be placed in a recumbent position to better expose the site of the procedure. 3) Disinfect the patient's skin as described above.

3.2 Treatment phase: Acupotomy, a 0.50 × 50 mm sterile, disposable, stainless steel acupotomy, is performed at 17 pre-defined acupoints without needle retention time. These points are Shiqizhui (EX-B8), Yaoshu (GV2), Yaoyangguan (GV3), Mingmen (GV4), Sanjiaoshu (BL22), Shenshu (BL23), Qihaishu (BL24), Dachangshu (BL25), Guanyuanshu (BL26), Yaoyan (EX-B7), and Huantiao (GB30). The doctors will choose the specifics of the depth, placement, and treatment strategy according to their medical judgments.


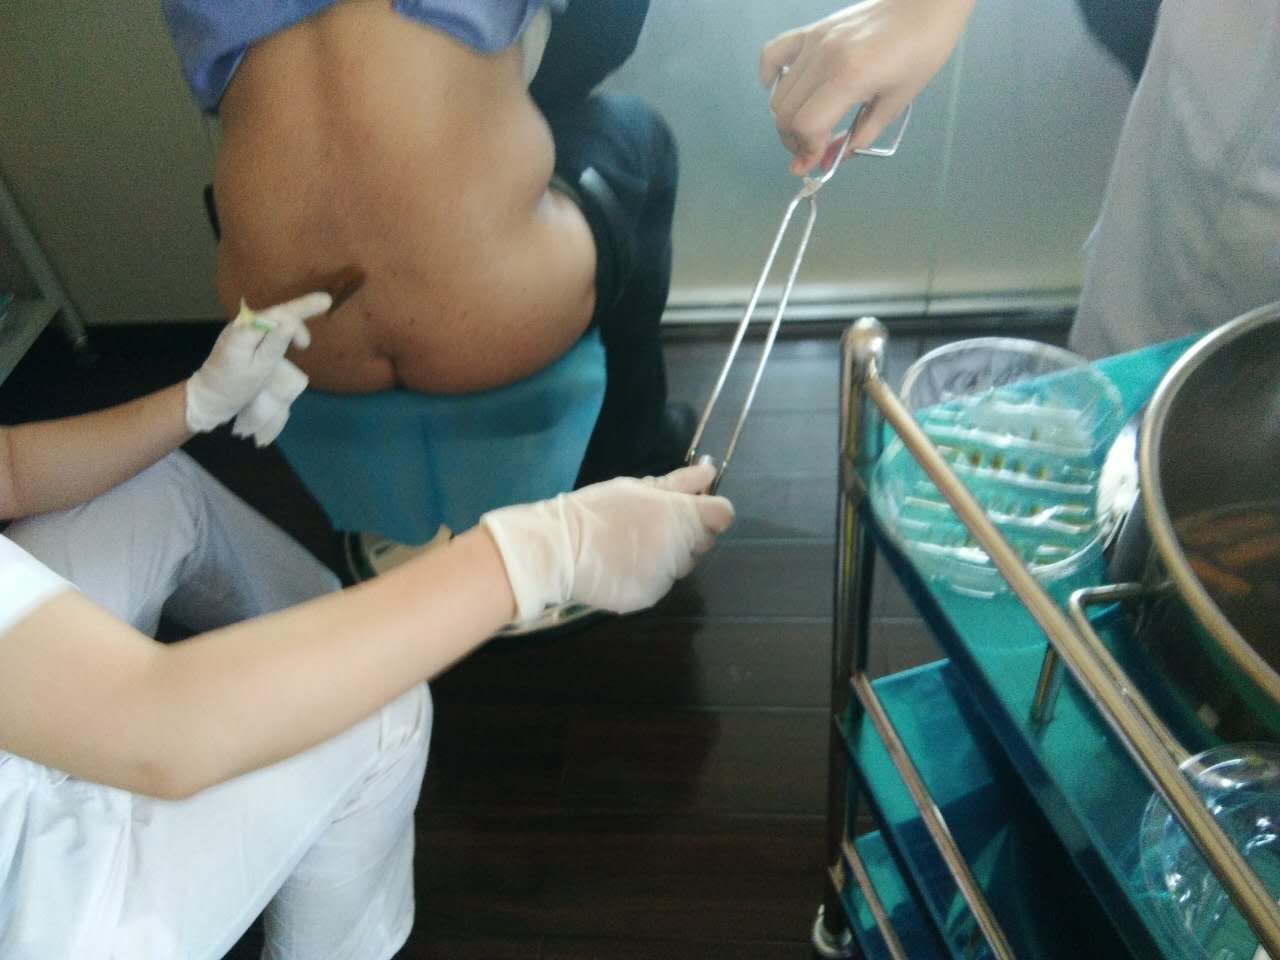

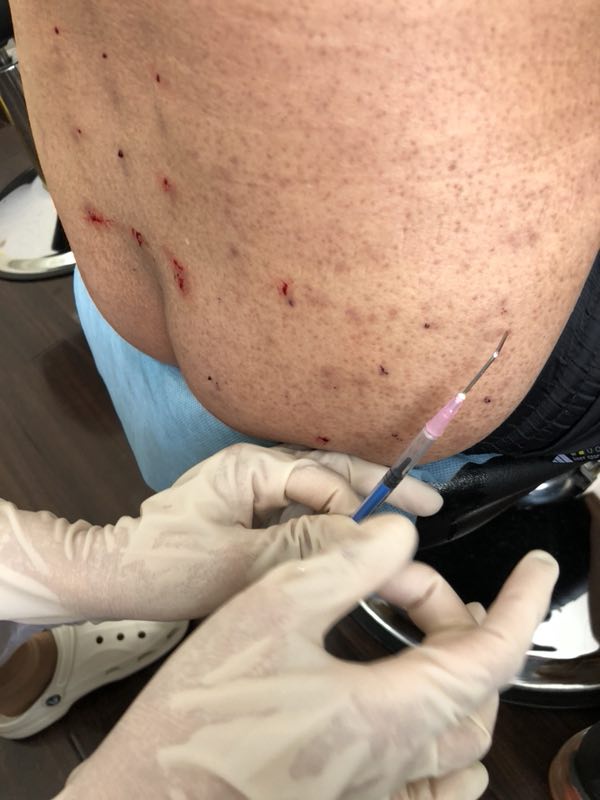
 The bamboo cups, thumb-like in diameter, are prepared and boiled in a stainless-steel pot with herbal decoction before treatment. After sterilization of the skin with 75% alcohol, practitioners will apply the injection needle vertically and pierce the skin with blood, and then quickly pick up the cup and swing off the hot water on the cup, and then apply it on the bleeding point, while the cup smoothly cooling down, it will be tightly suct on the acupuncture points, along the Du and bladder meridians and Ashi points. The cup will drop or be taken away for nearly 20 min. The injection needles and bamboo cups will be immediately disposed of after treatment, and the herbal decoction will be used for half a day. The treatment will last about 25 min.


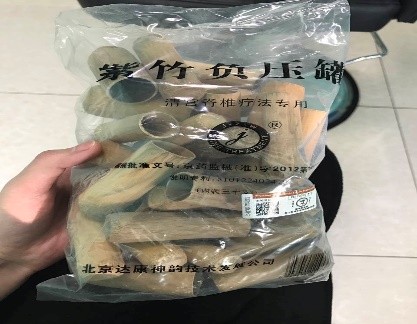

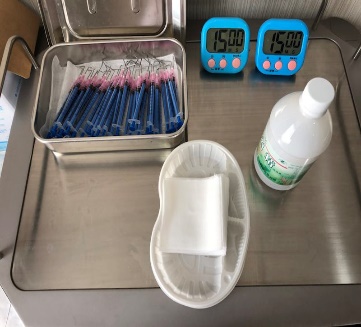

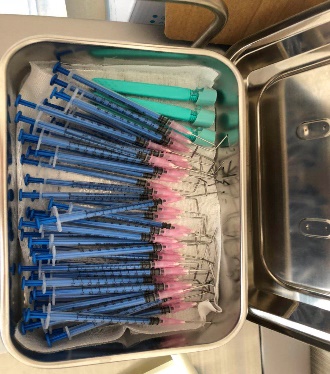

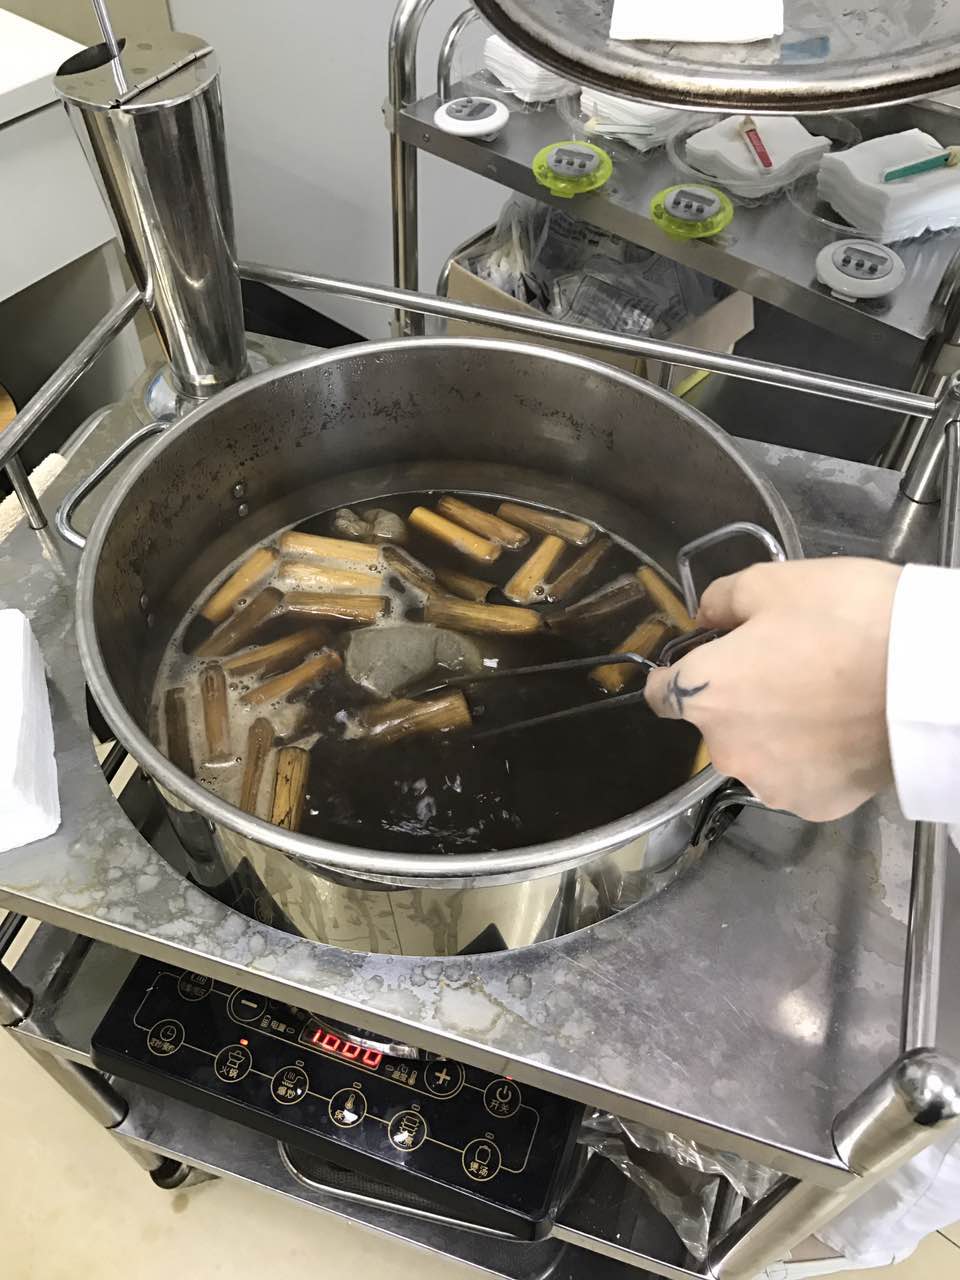


**Bloodletting needles Bloodletting needles Bamboo cups**


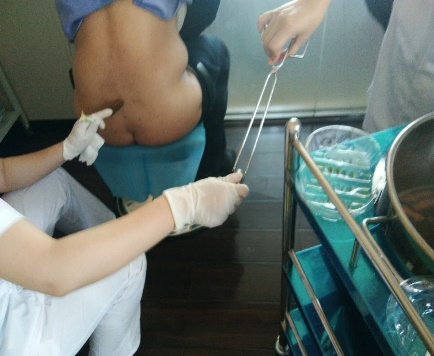

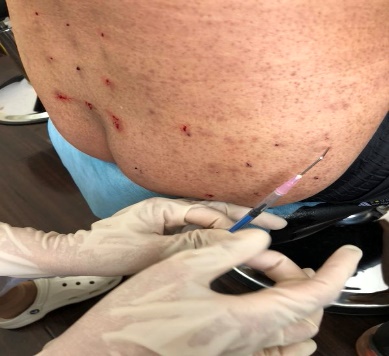

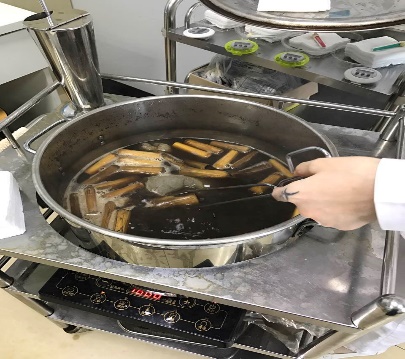


**
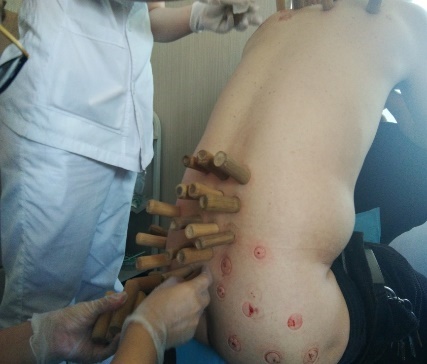
**
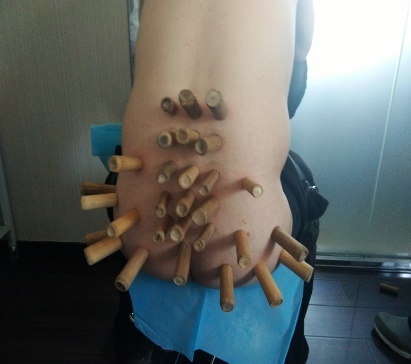

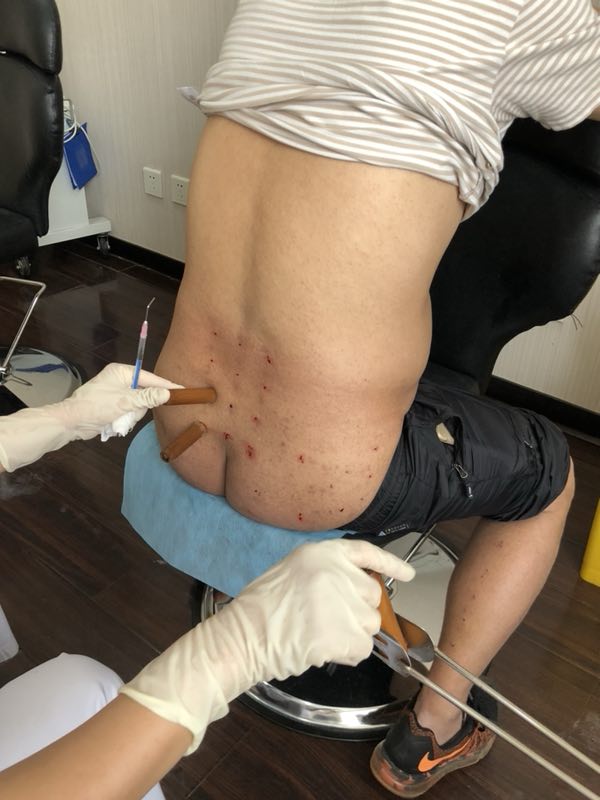
**Bamboo cups in boiling herb Bloodletting Herbal-cupping1**


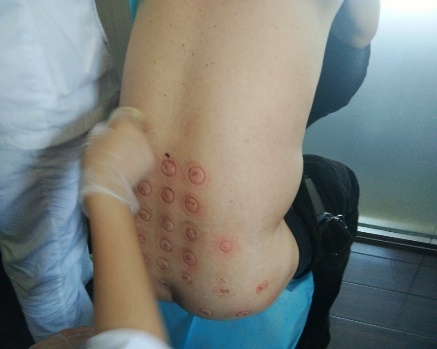

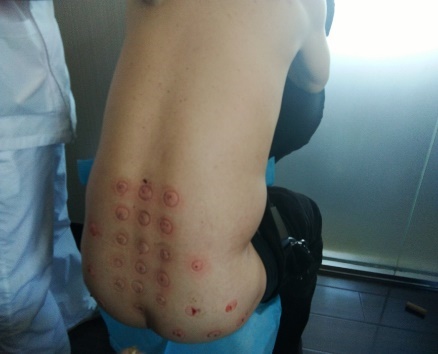

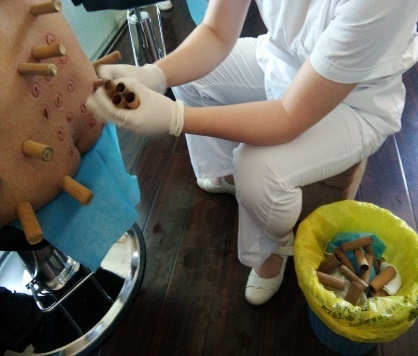
**Herbal-cupping 2 Herbal-cupping 3 Retaining cupping**

**Taking off cups Clean blood Rest**

**S7 Introduction of process of** **Tuina with ointment**

1.Treatment room:

1) Light: One external window should be opened for light for every 15 square metres of operating room, with a light opening of not less than 3 square metres. 2) Temperature: The indoor temperature should be maintained at around 26 degrees. 3) Privacy: As the patient needs to expose the area to be treated during the Tuina, it is required that the room in which the treatment is carried out allows for patient privacy. 4) Quiet: Loud noises are strictly prohibited in the treatment room.

2. Operating procedures：

2.1 Preparation phase: The therapist washes hands with running water before Tuina. The patient lies prone on a Tuina bed with a disposable towel on the lower back.

2.2 Treatment phase: The therapists apply the Chinese herbal medicine over lower back and hip-sacral regions three times before Tuina. If the patients have severe lower limb symptoms, the lower limbs will be medicated with ointment. After ointment becomes dry, therapists stand over the patient and knead the patient's T2-S1 spine three times for 1.5 minutes using the pressing technique. And then the therapists apply rolling on the Bladder meridians along both sides of the spine for 2 to 3 minutes. Patient’s buttocks and lower limbs will be manipulated by the rolling method as well, if patients feel uncomfortable. The therapists press the acupoints, including Sanjiaoshu (BL22), Shenshu (BL23), Qihaishu (BL24), Dachangshu (BL25), Guanyuanshu (BL26), Yaoyan (EX-B7), and Huantiao (GB30). Zusanli (SP35), and Ashi points for 3-4 minutes. Finally, scrubbing manipulation will be used with heated palms. The treatment will last 7-10 min.
